# Supplementary material for: Surface-grafted zwitterionic polymers as platforms for functional supported phospholipid membranes
Source: Royal Society of Chemistry journal article supplement (doi:10.1039/c1sm06709e), 2011-12-12
Supplement: c1sm06709e.pdf [file c1sm06709e.pdf]

## Supporting Information

### Surface-Grafted Zwitterionic Polymers as Platforms for Functional Supported Phospholipid Membranes

*M. Gabriella Santonicola, Mine Memesa, Anna Meszyńska, Yujie Ma, G. Julius Vancso\**

Materials Science and Technology of Polymers, MESA+ Institute for Nanotechnology,  
University of Twente, P.O. Box 217, 7500 AE Enschede, The Netherlands

E-mail: g.j.vancso@utwente.nl

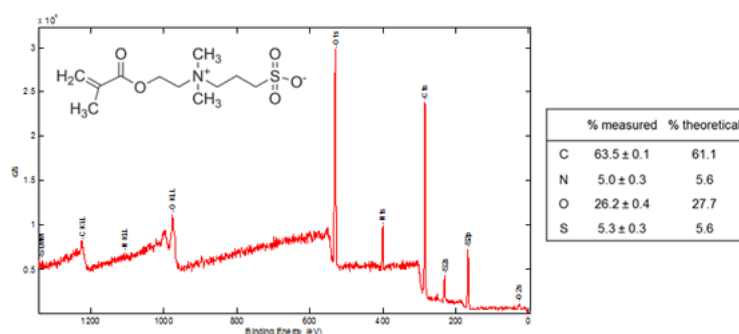

**Fig. S1** XPS survey spectrum of poly(SBMA) brush grafted from an initiator-coupled glass surface using ATRP for 1 h ( $[SBMA] = 0.5$  M,  $[Cu^I]/[Cu^{II}] = 8$ , methanol/water = 4:1 v/v). Analysis of the atomic composition of the polymer layer from high-resolution element scans is summarized in the table on the left. A good agreement was found between the experimentally determined atomic compositions and the theoretical values predicted from the structure of the sulfobetaine methacrylate unit.

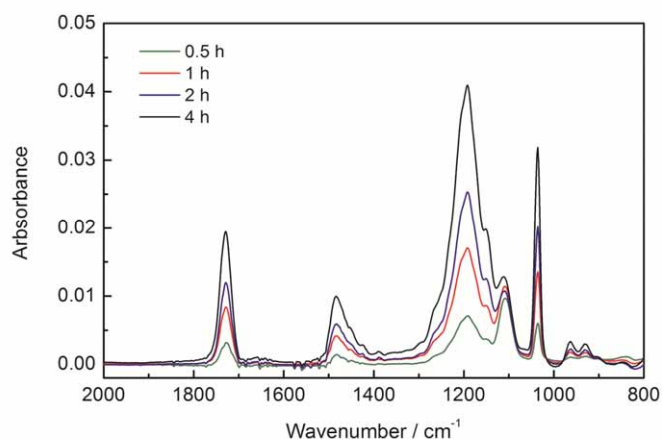

**Fig. S2** Fingerprint region of FTIR spectra for poly(SBMA) brushes grafted from silicon surfaces using ATRP with different polymerization times ( $[\text{SBMA}] = 0.5 \text{ M}$ , methanol/water 4:1 v/v,  $[\text{Cu}^{\text{I}}]/[\text{Cu}^{\text{II}}] = 8$ ). Spectra show the characteristic absorption bands at around  $1730 \text{ cm}^{-1}$  (C=O stretching),  $1485 \text{ cm}^{-1}$  (C=N stretching),  $1193 \text{ cm}^{-1}$  (S=O stretching), and  $1035 \text{ cm}^{-1}$  ( $\text{SO}_3^-$  vibration). Assignment of the absorption bands based on the *NIST Chemistry WebBook* (Linstrom P.J., Mallard W.G., eds., NIST Standard Reference Database Number 69, National Institute of Standards and Technology, Gaithersburg, MD, USA).

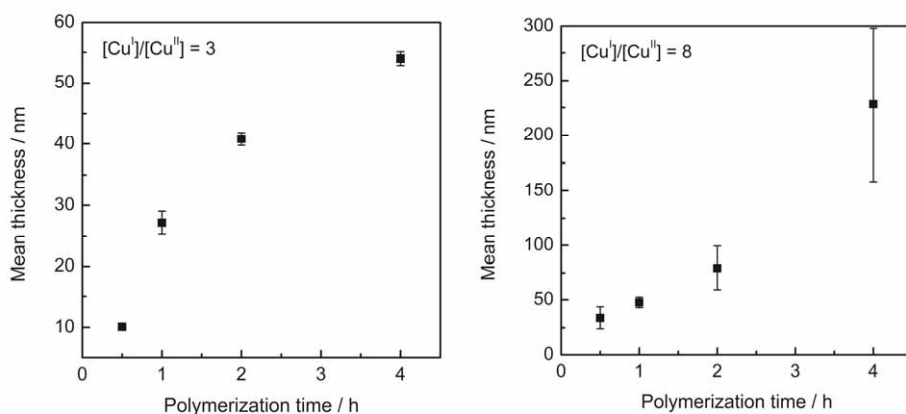

**Fig. S3** Growth kinetics of poly(SBMA) layers grafted from silicon surface using ATRP ( $[\text{SBMA}] = 0.5 \text{ M}$ , methanol/water 4:1 v/v) with different  $[\text{Cu}^{\text{I}}]/[\text{Cu}^{\text{II}}]$  ratios as measured by ellipsometry in air. Error bars are given by the standard deviation of an array of 25 measurements across the polymer brush surface (sampled area  $5 \times 5 \text{ mm}^2$ ).

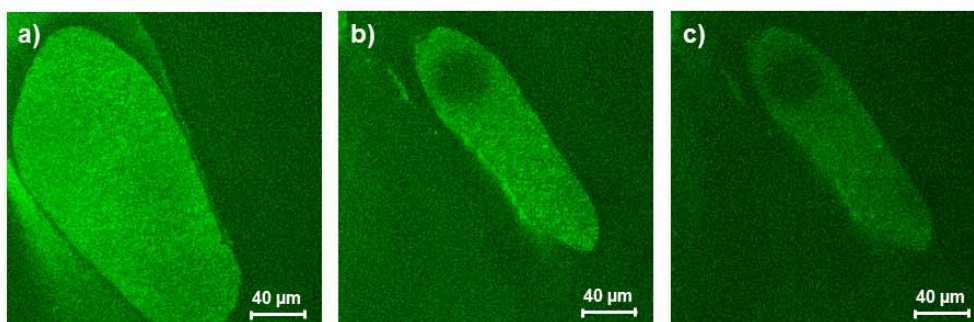

**Fig. S4** Fluorescence images of a DOPC membrane (lipid 3 mg/mL, NBD-PC 2 mol %) assembled on a piranha-cleaned glass surface (a) and over the course of a FRAP experiment at 4 min (b) and 50 min (c) after photobleaching (bleached spot diameter 40  $\mu\text{m}$ ). Phosphate buffered solution: 50 mM phosphate, 150 mM KCl, pH 7.4.
